# Supplementary material
Source: PubMed Central journal article supplement (PMC8243404)

# CANINE IMMUNOBLOTS

Non-Nuclear fractions

CTL      AF

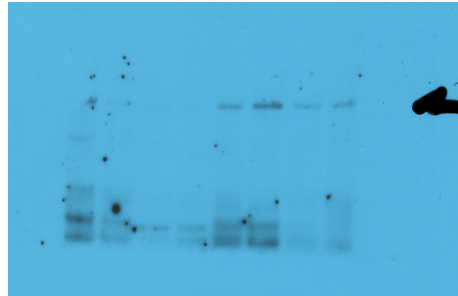

IP3R1 (314kDa)

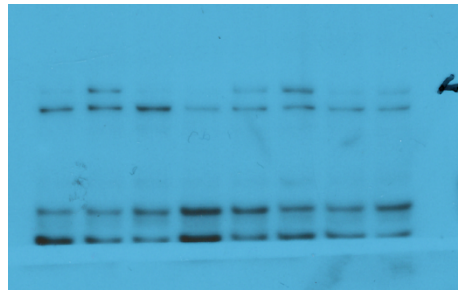

IP3R2 (260kDa)

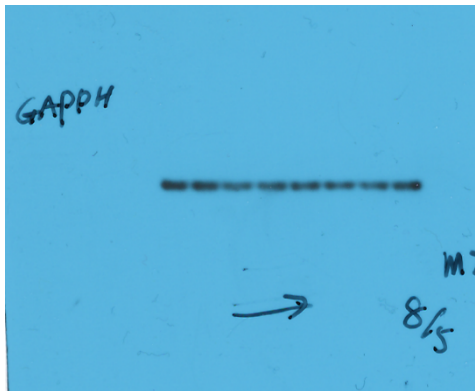

GAPDH (37kDa)

Nuclear fractions

CTL      AF

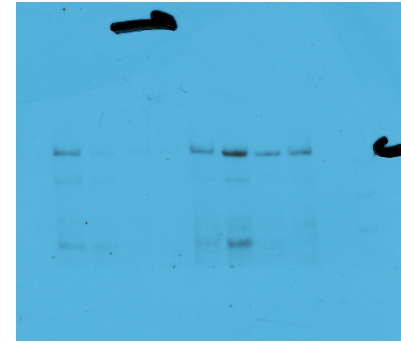

IP3R1 (314kDa)

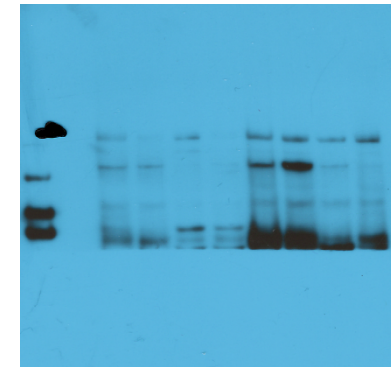

IP3R2 (260kDa)

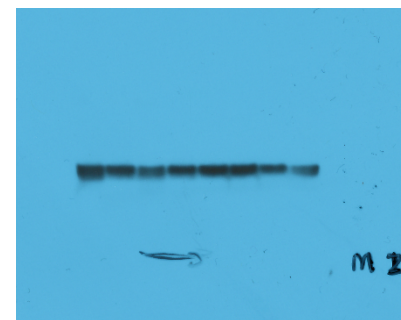

Histone H3 (17kDa)

Non-Nuclear fractions

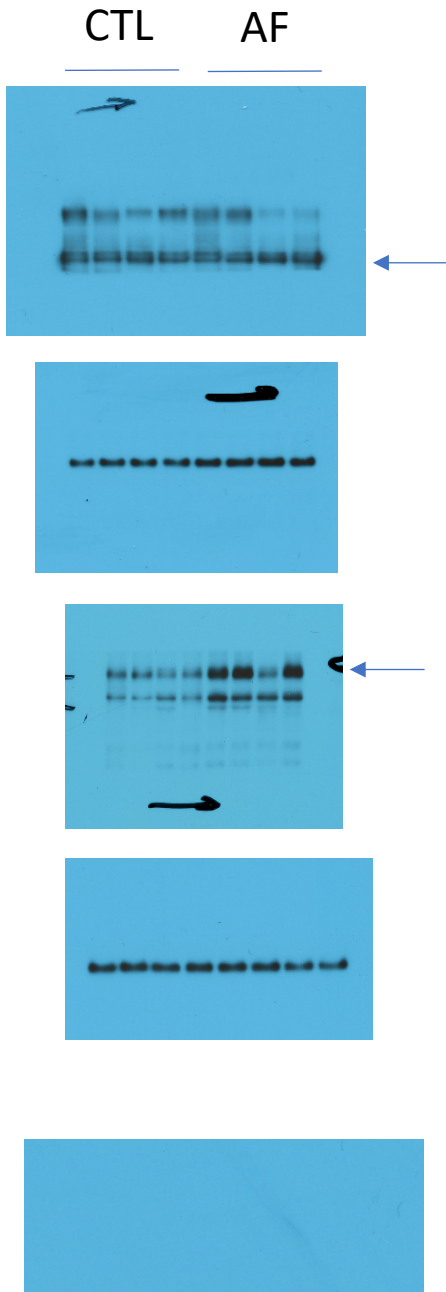

SERCA2 (110kDa)

CaMKII-Thr287 (50kDa)

CaMKII-delta (50kDa)

GAPDH (37kDa)

Histone H3 (17kDa)

Nuclear fractions

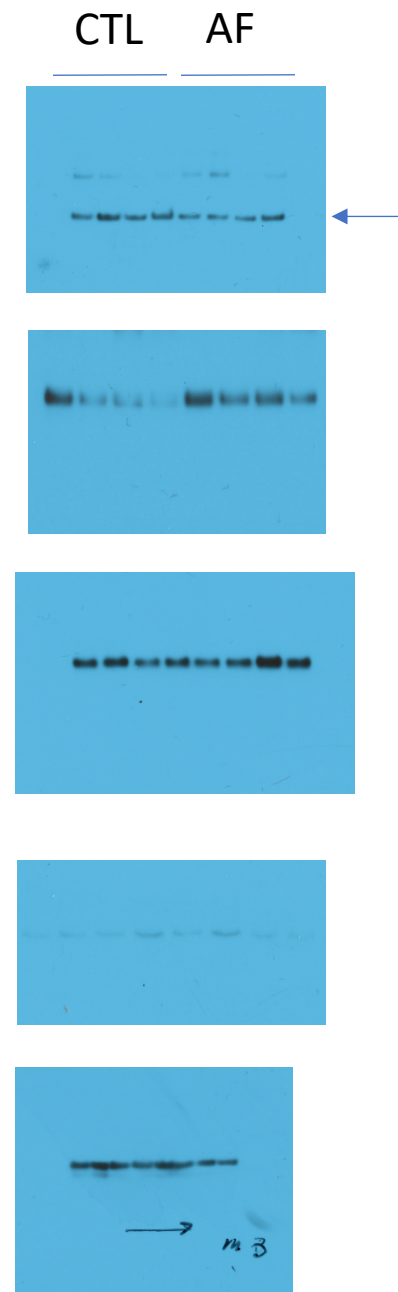

CTL AF

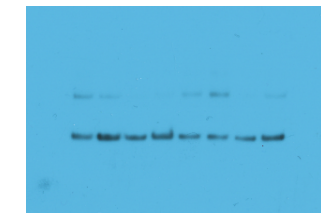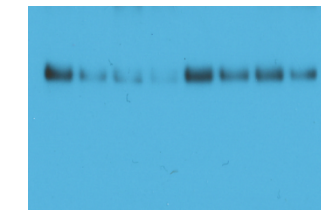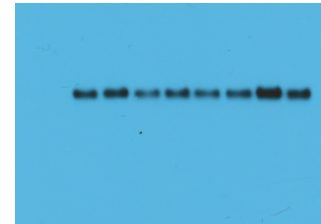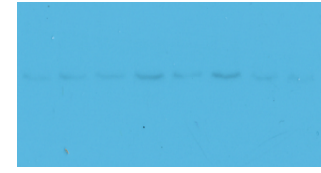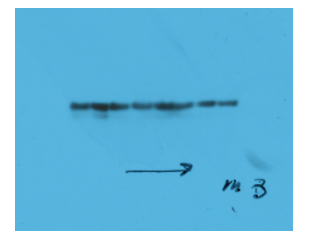

Non-Nuclear fractions

Nuclear fractions

CTL      AF

CTL      AF

140kDa

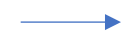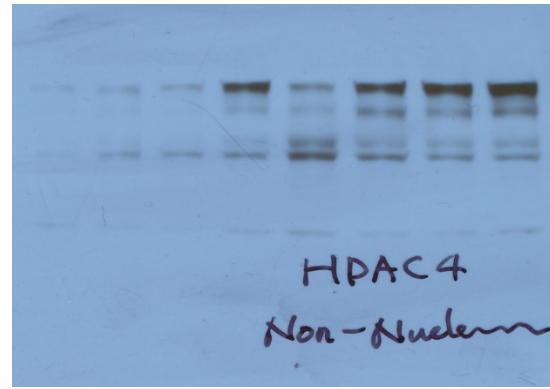

HDAC4

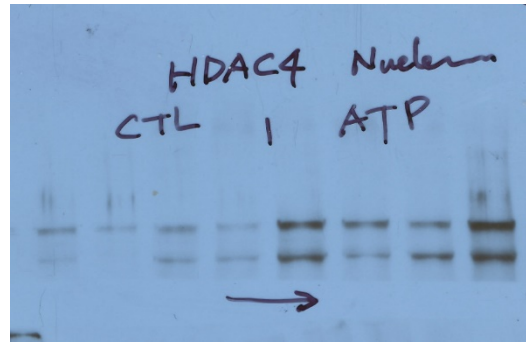

140kDa

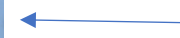

37kDa

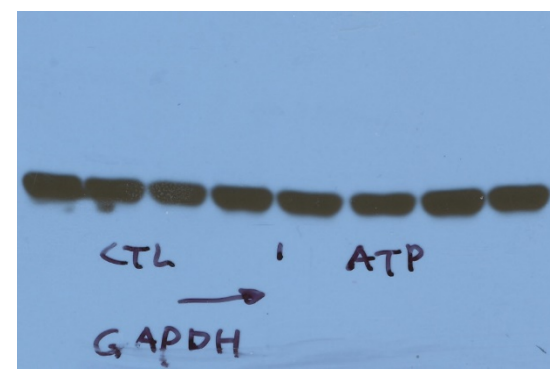

GAPDH

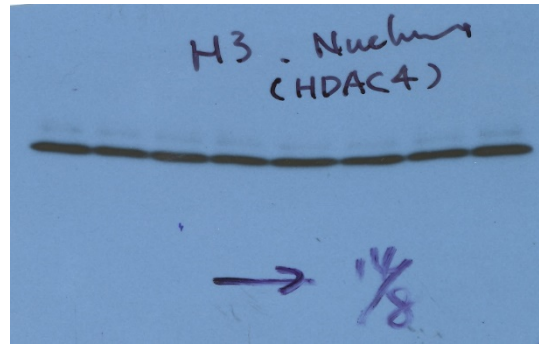

Histone 3 (17kDa)

miR-26a Transfection

IP3R1

GAPDH

314kDa →

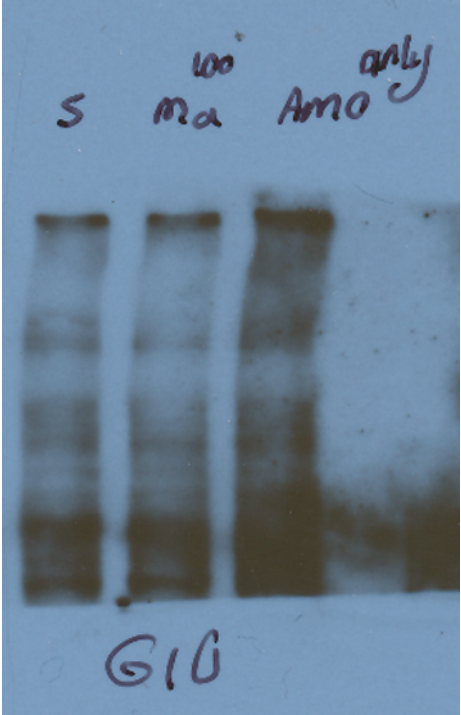

miR-NC miR-26a AMO-26a

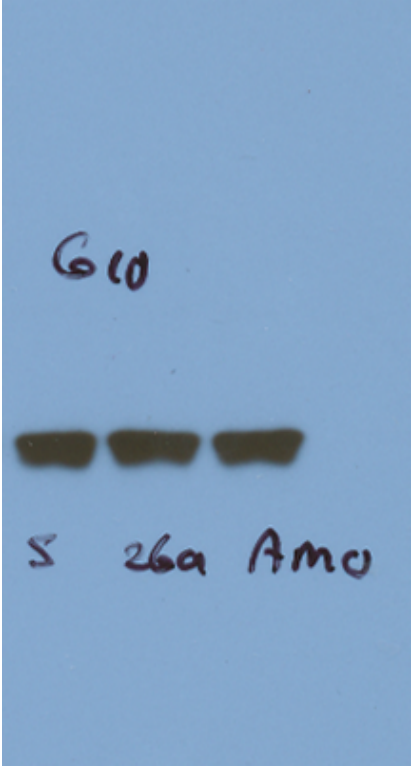

miR-NC miR-26a AMO-26a

IP3R1 expression in AF

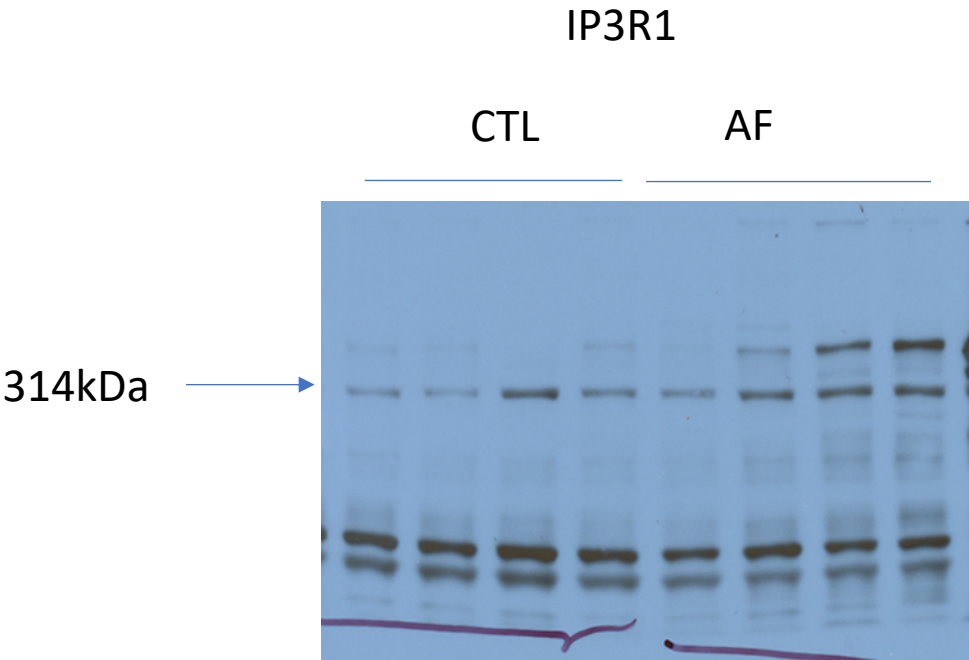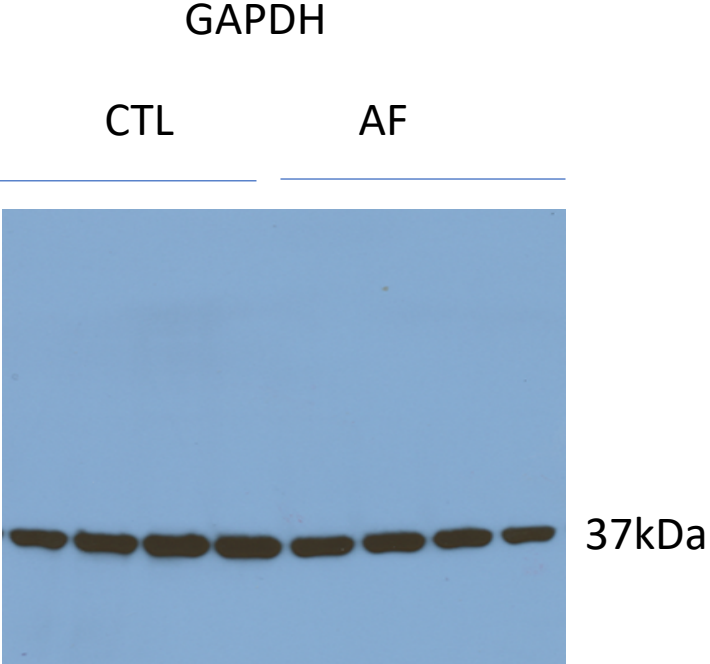

Non-Nuclear fractions

CTL      AF

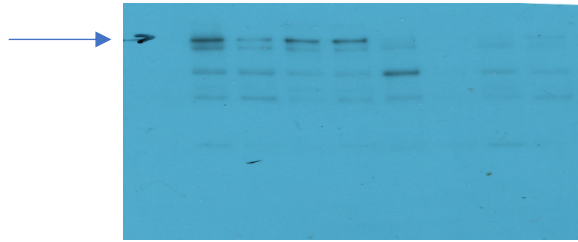

RyR2-Total

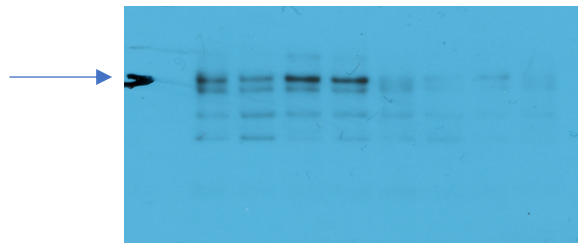

RyR2-Ser2808

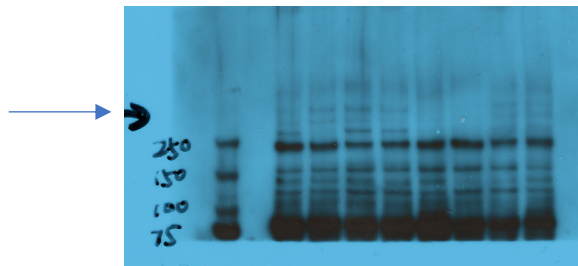

RyR2-Ser2814

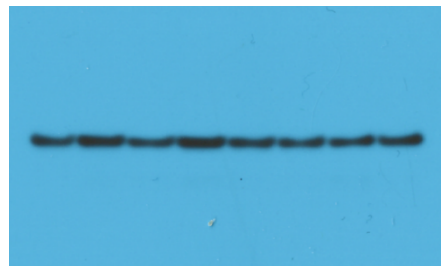

GAPDH (37kDa)

Nuclear fractions

CTL      AF

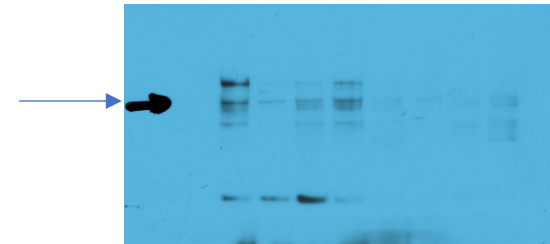

RyR2-Total (565kDa)

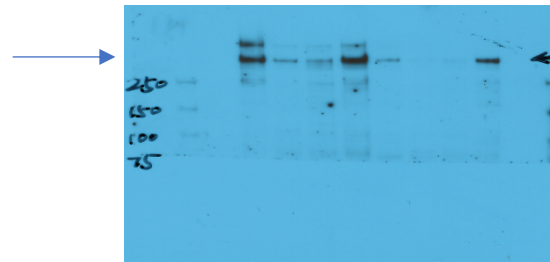

RyR2-Ser2808 (565kDa)

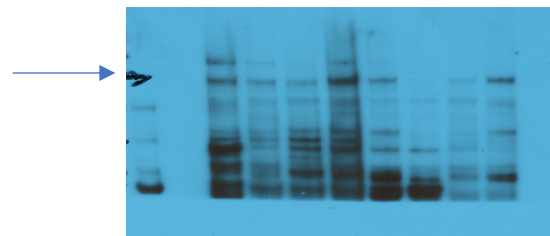

RyR2-Ser2814 (565kDa)

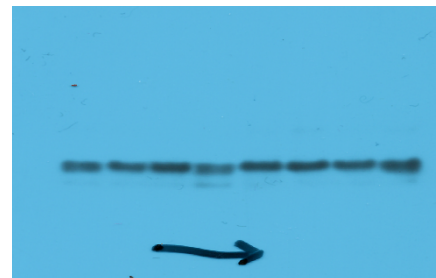

Histone H3 (17kDa)

Non-Nuclear fractions    Nuclear fractions

P1    P3    P1    P3

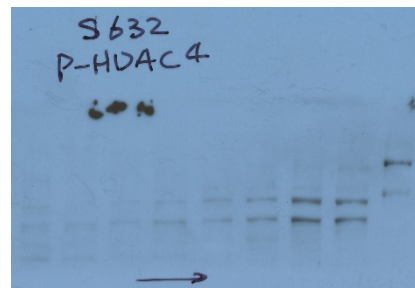

P-HDAC4 (S632) (140kDa)

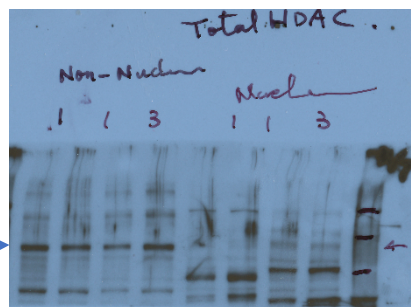

P-HDAC4 (S632) (140kDa)

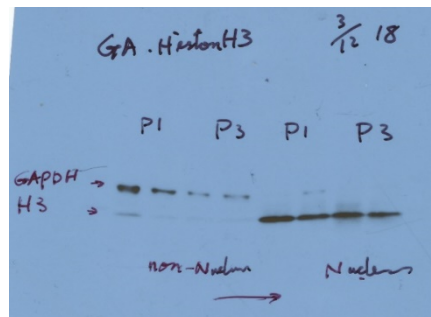

GAPDH (37kDa)

Histone 3 (17kDa)





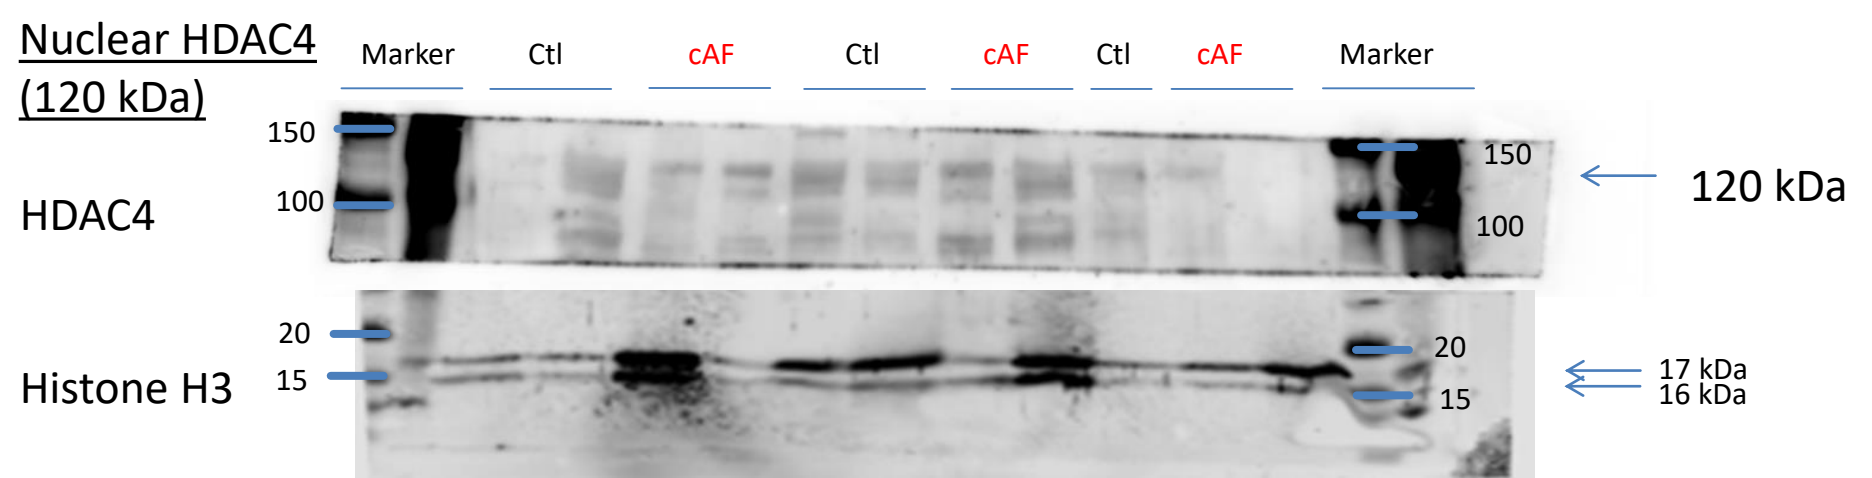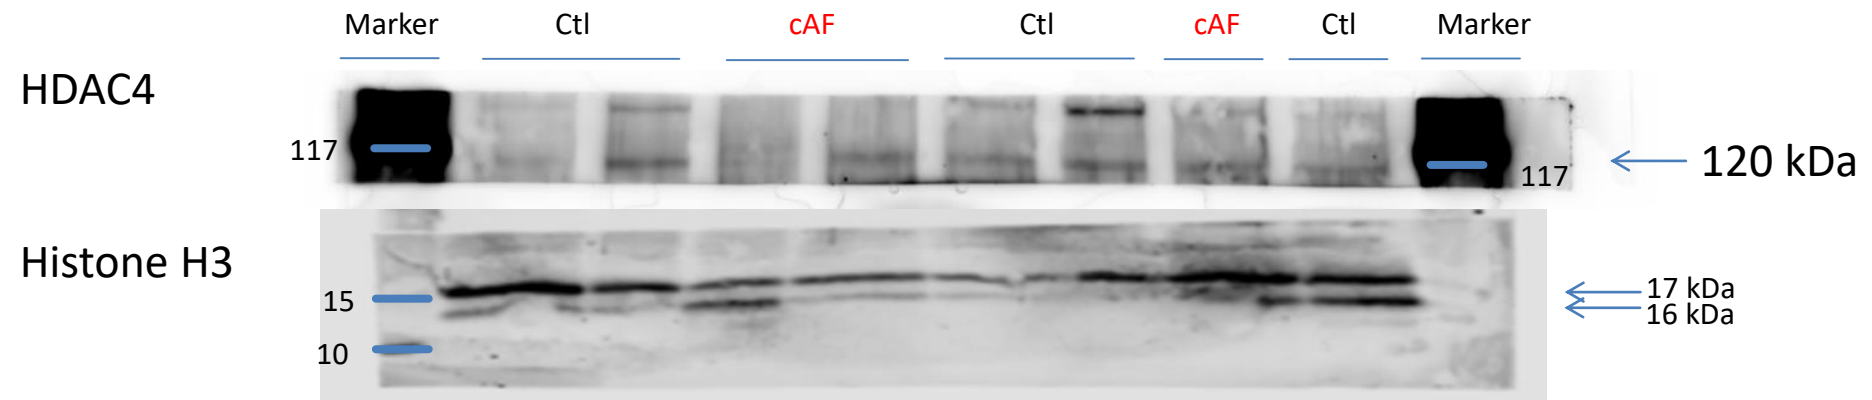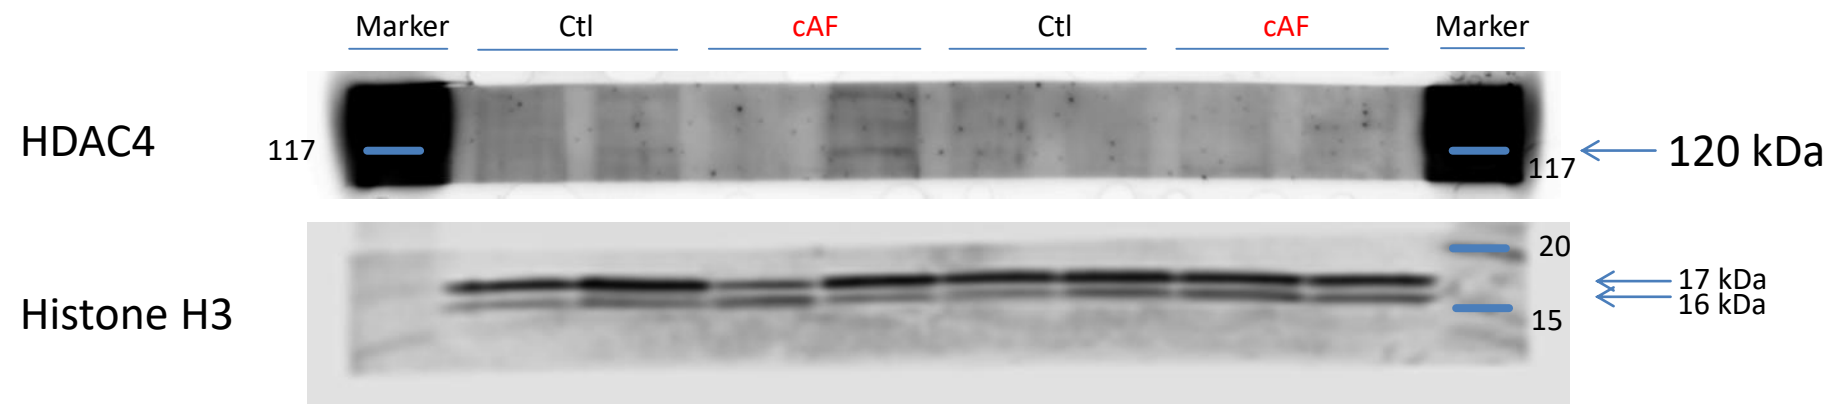

Non-nuclear  
HDAC4 (120 kDa)

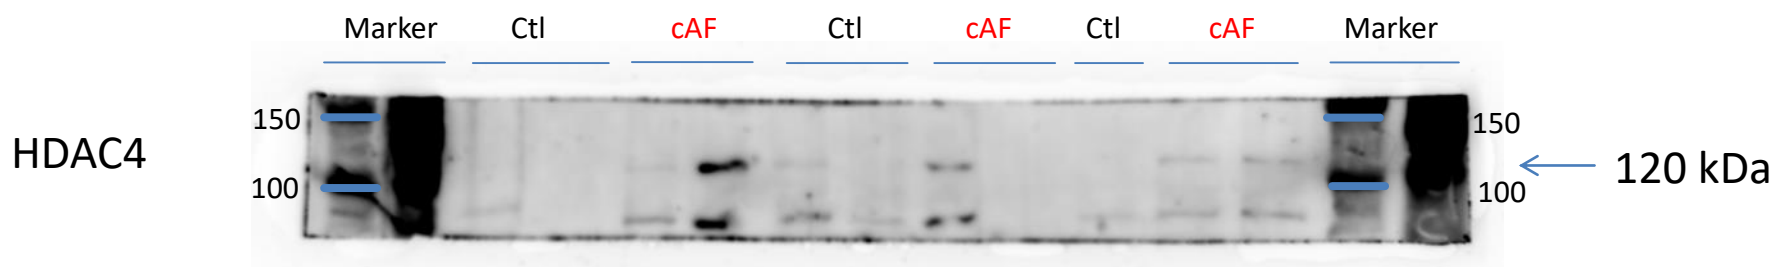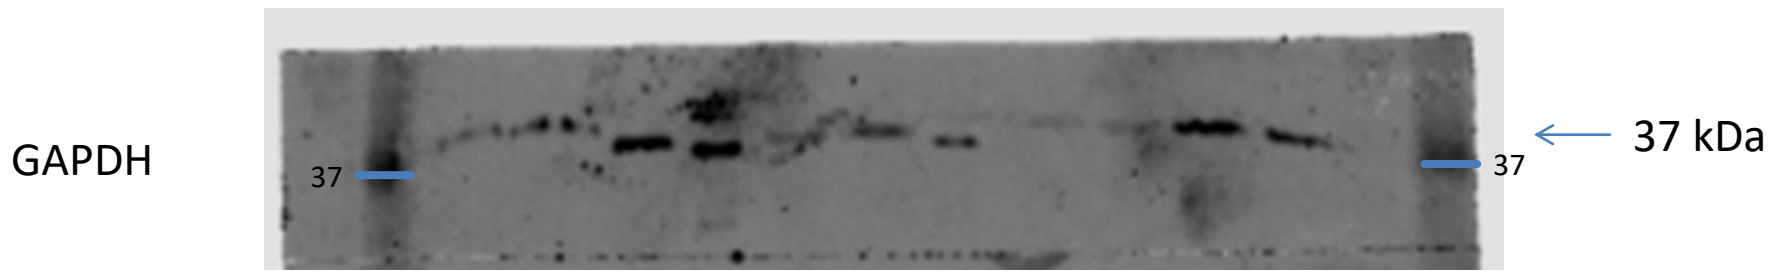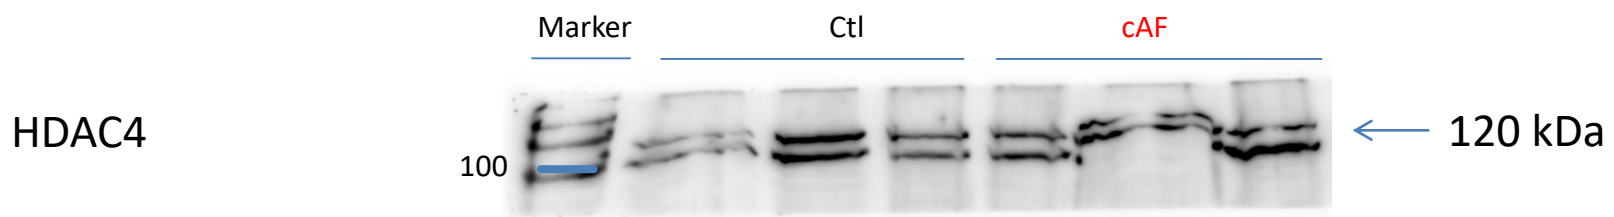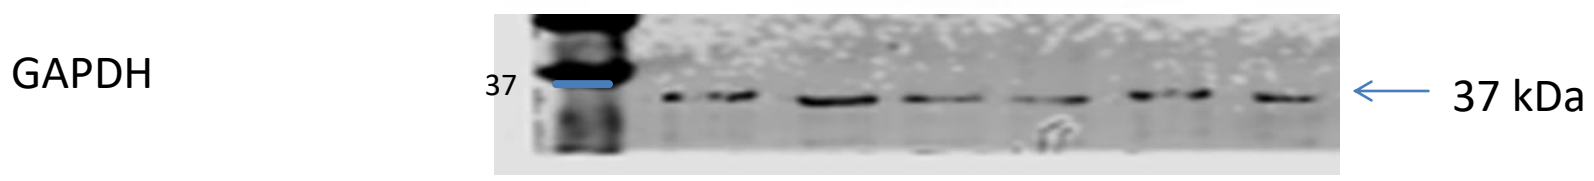

Non-nuclear  
HDAC4 (120 kDa)

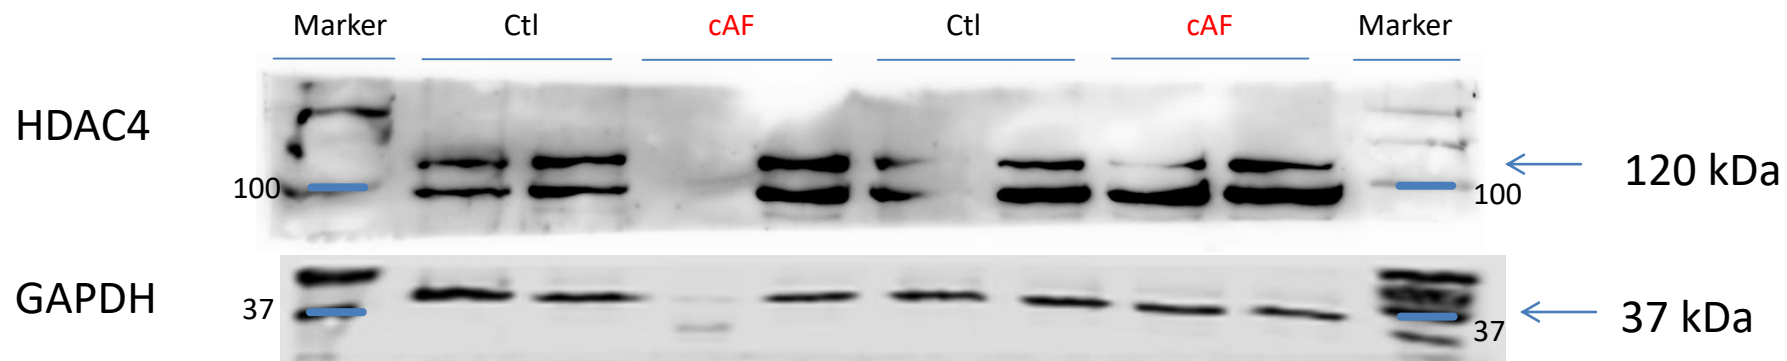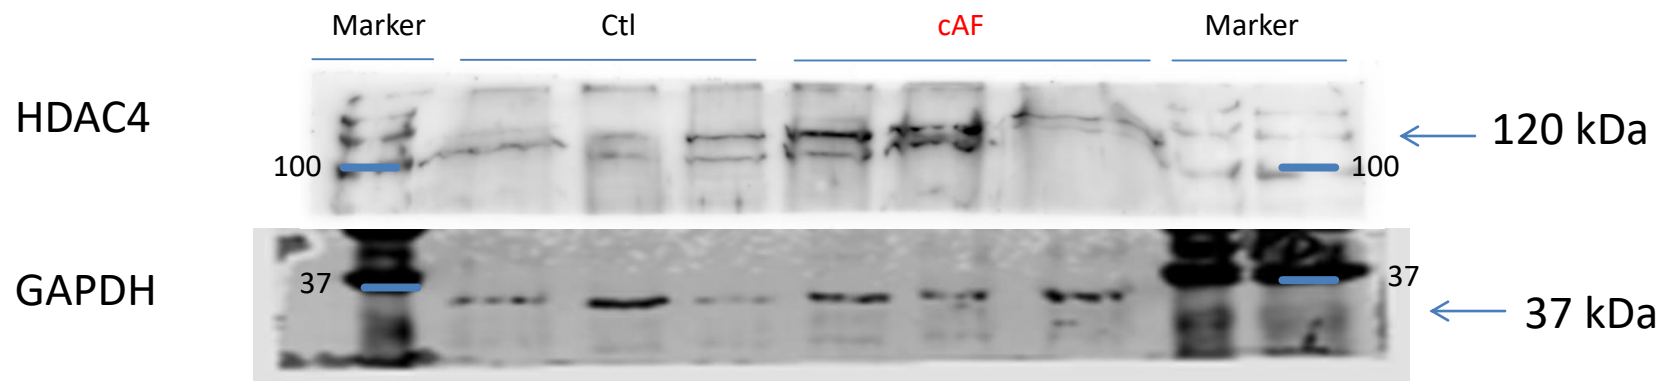

Nuclear SERCA2  
(100 kDa)

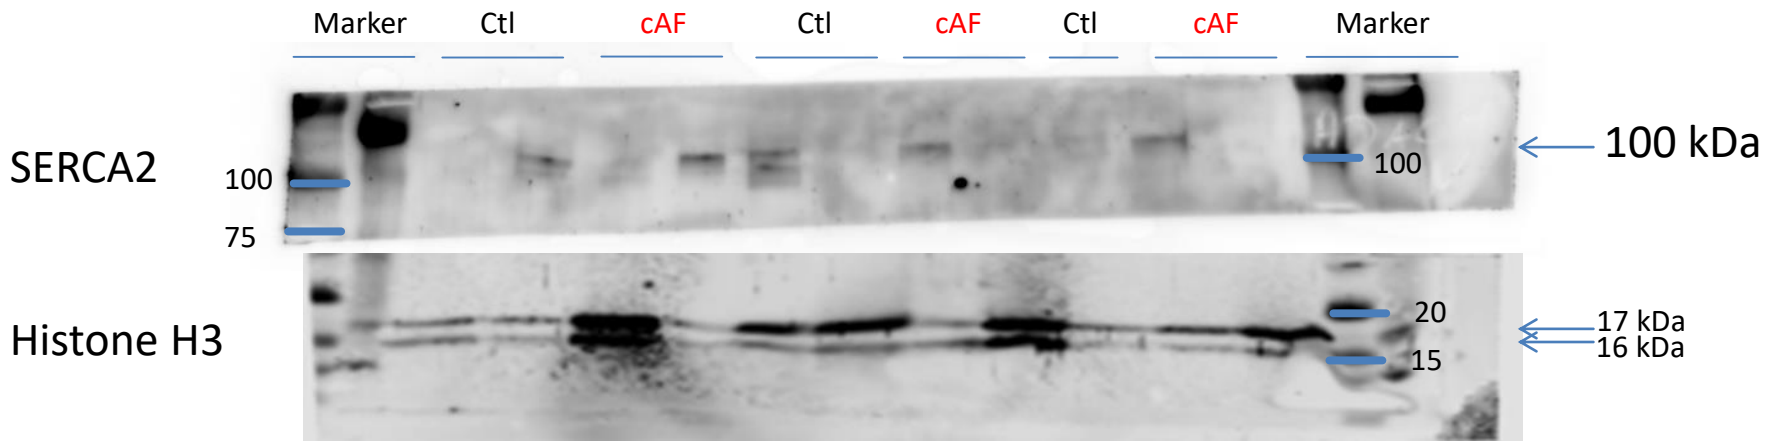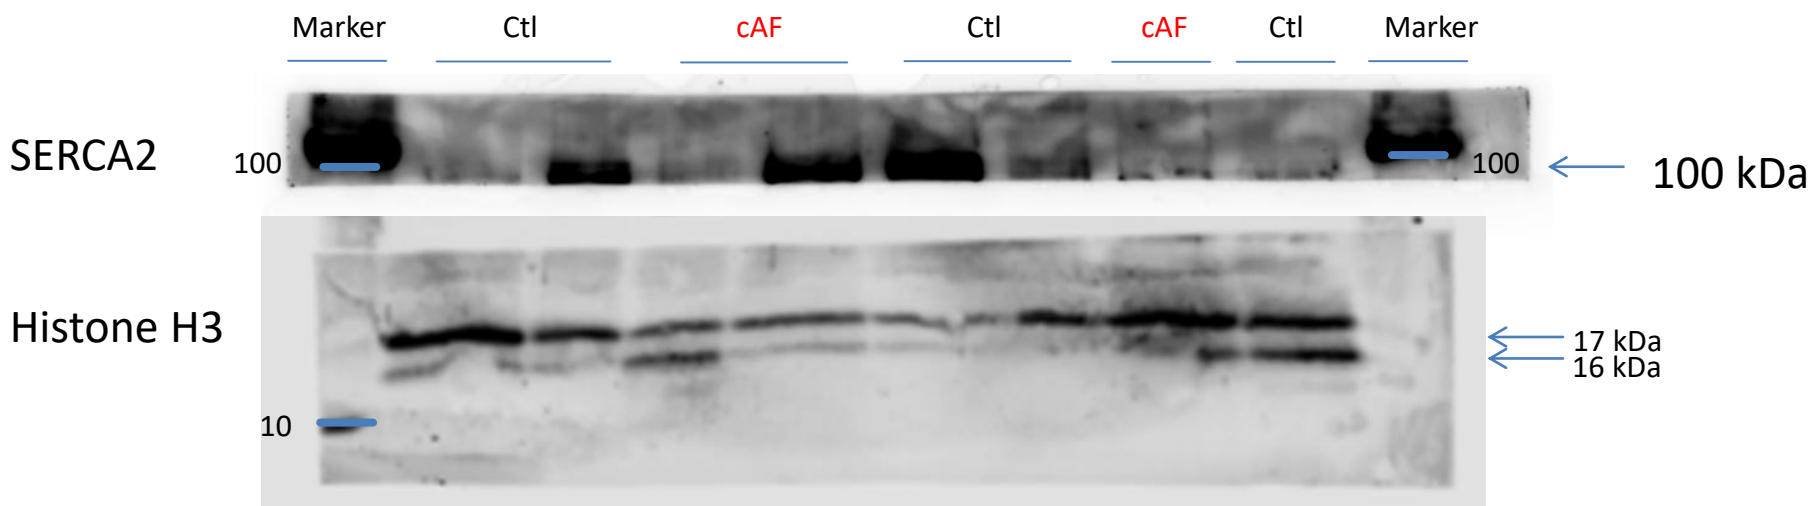

Non-nuclear  
SERCA2 (100 kDa)

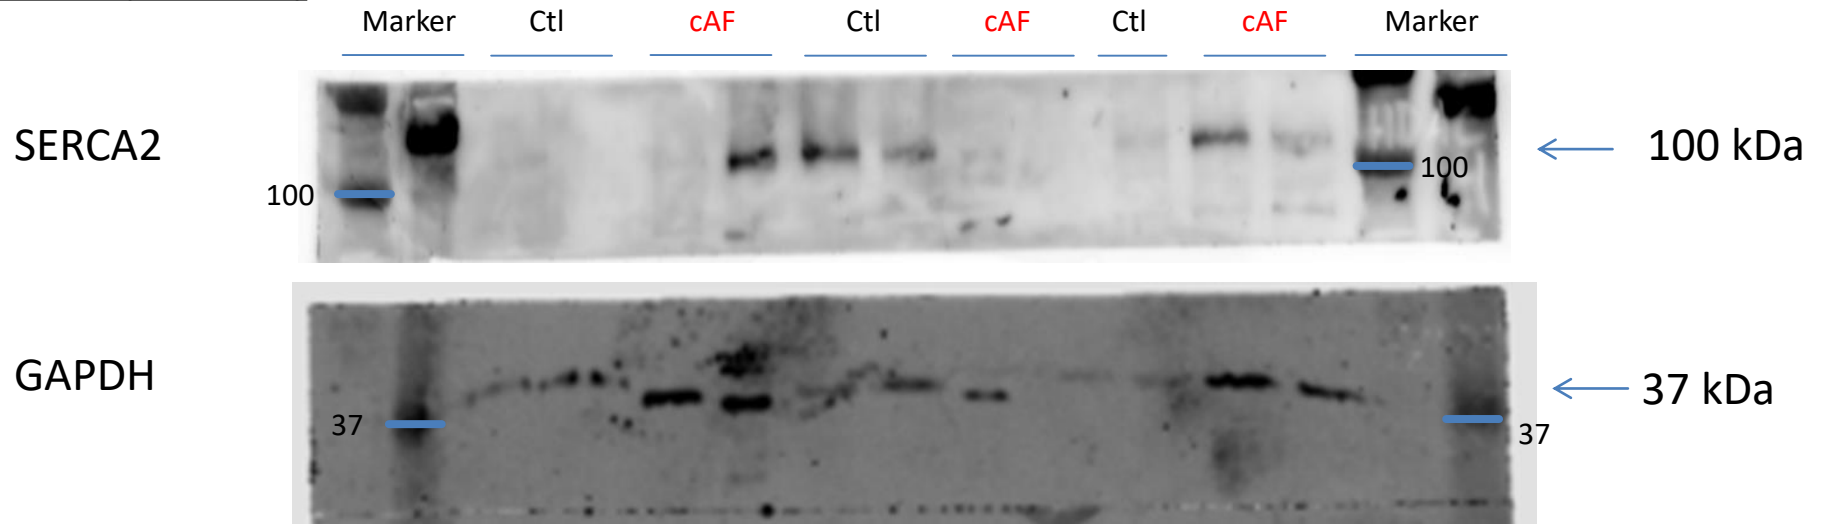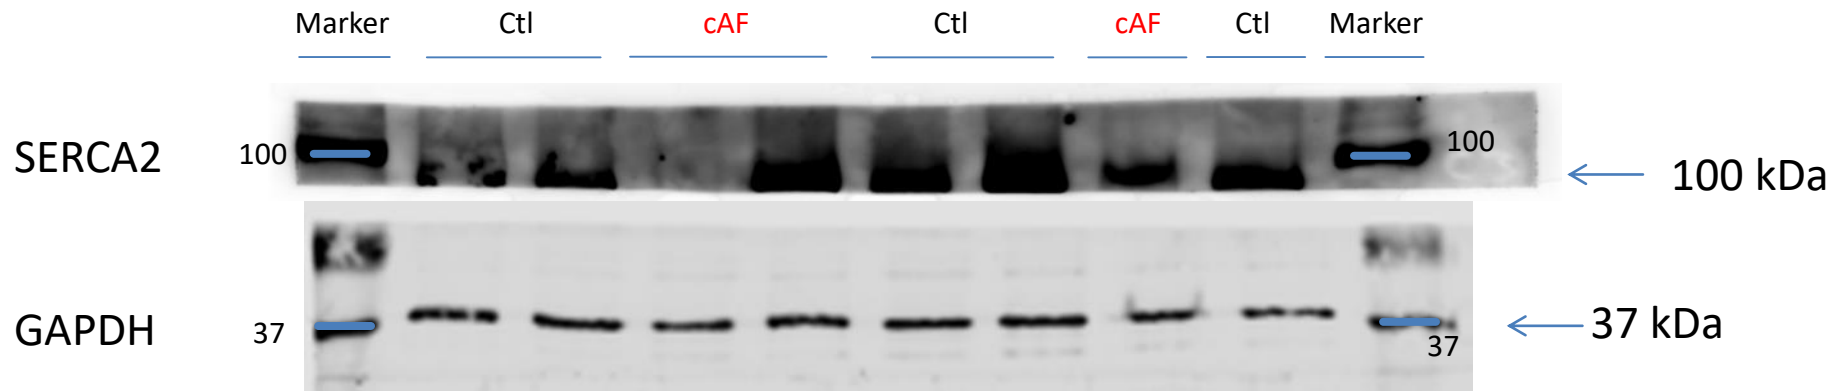

Non-nuclear  
SERCA2 (100 kDa)

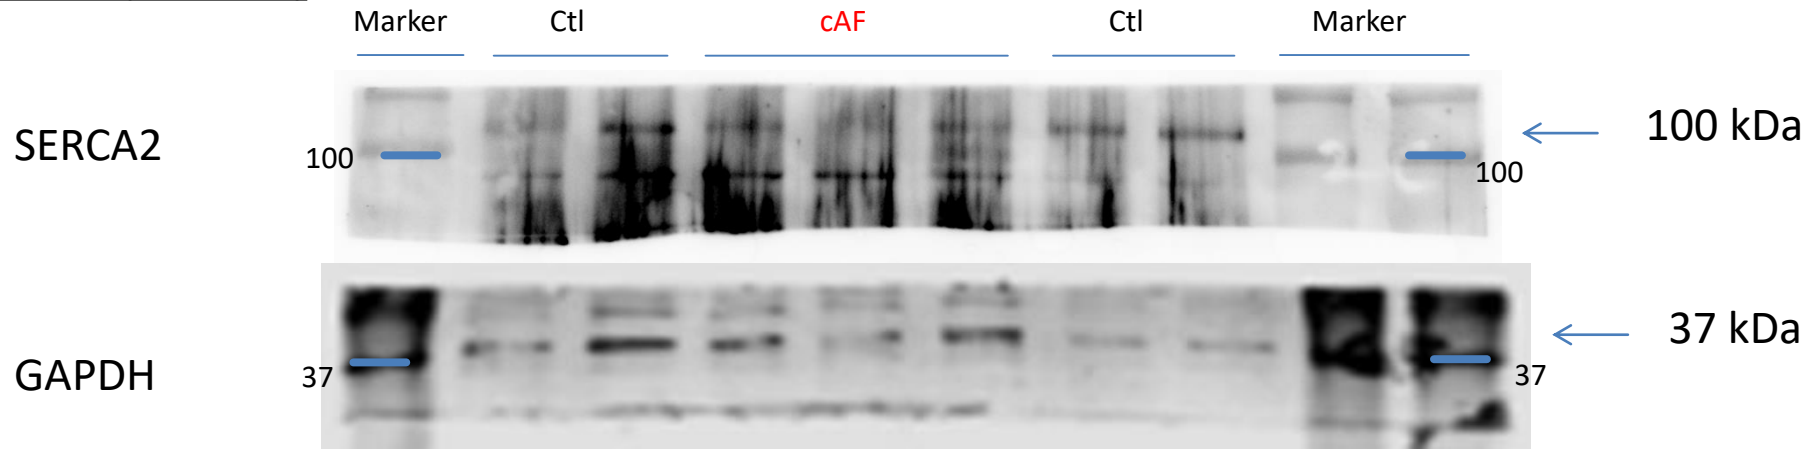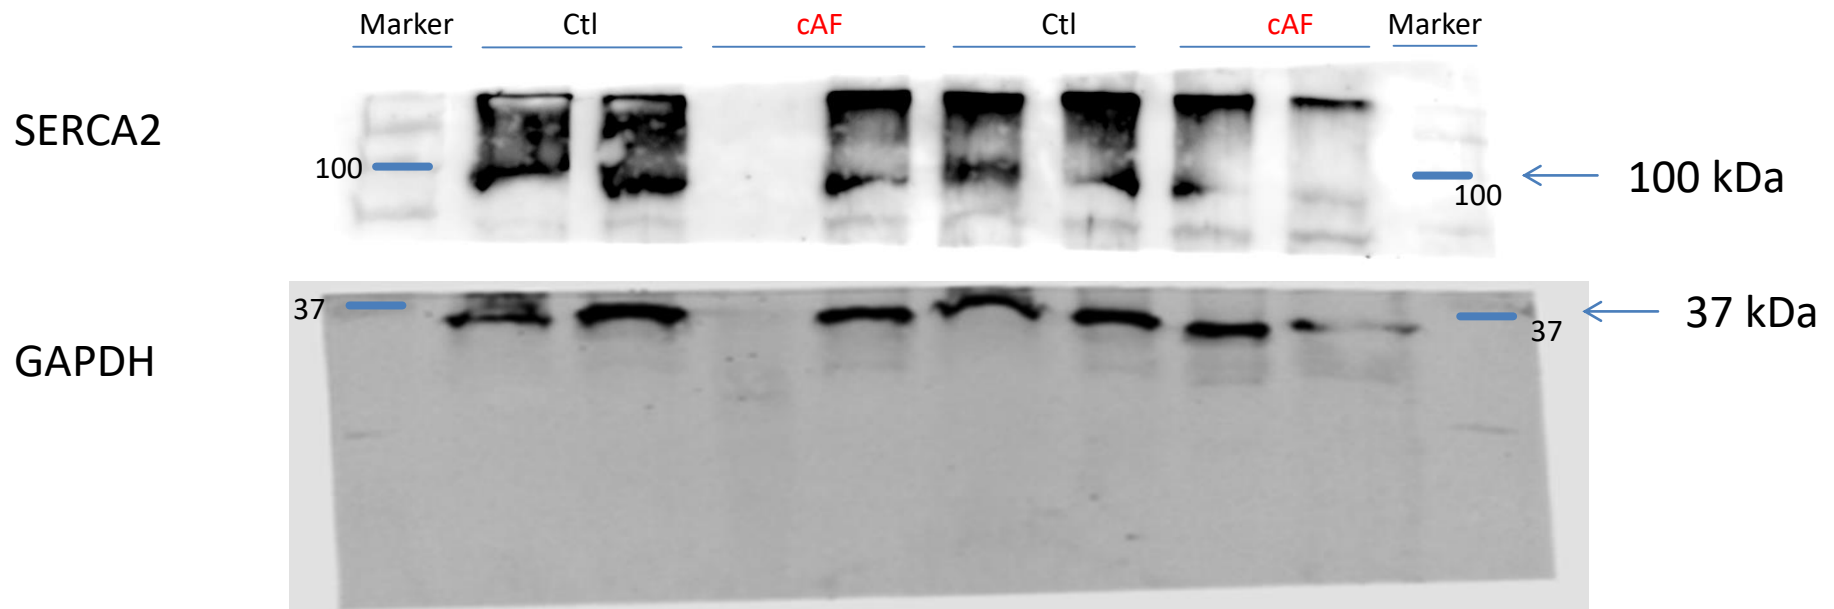

Nuclear CaMKII $\delta$   
(54/56 kDa)

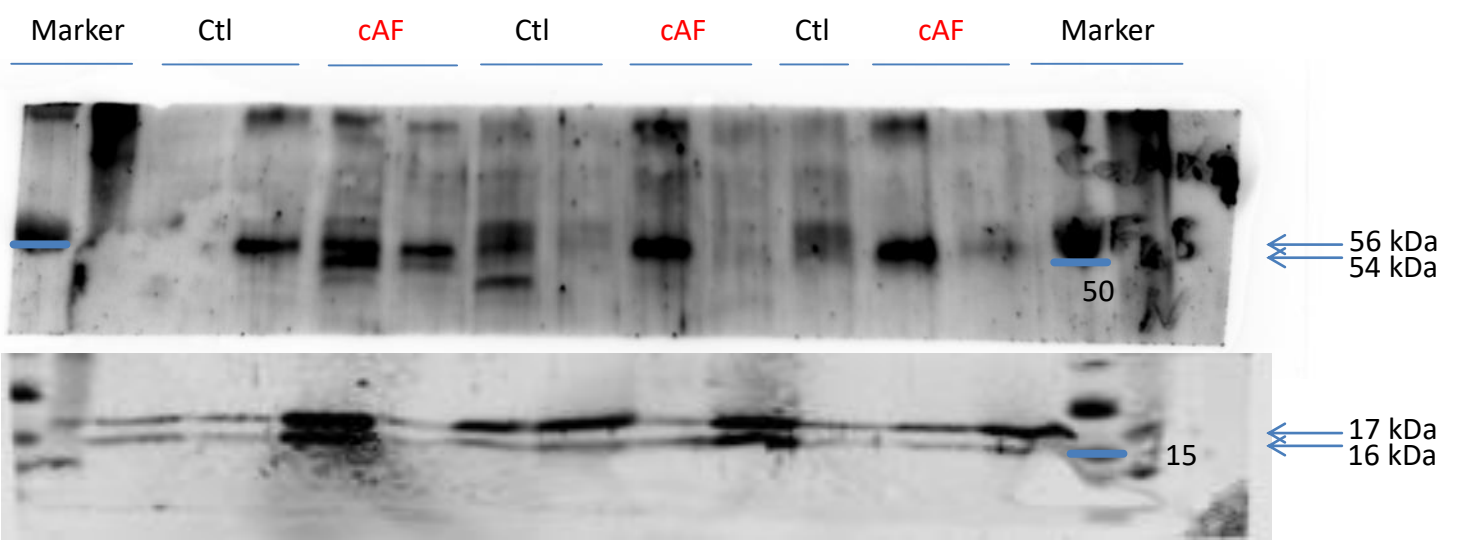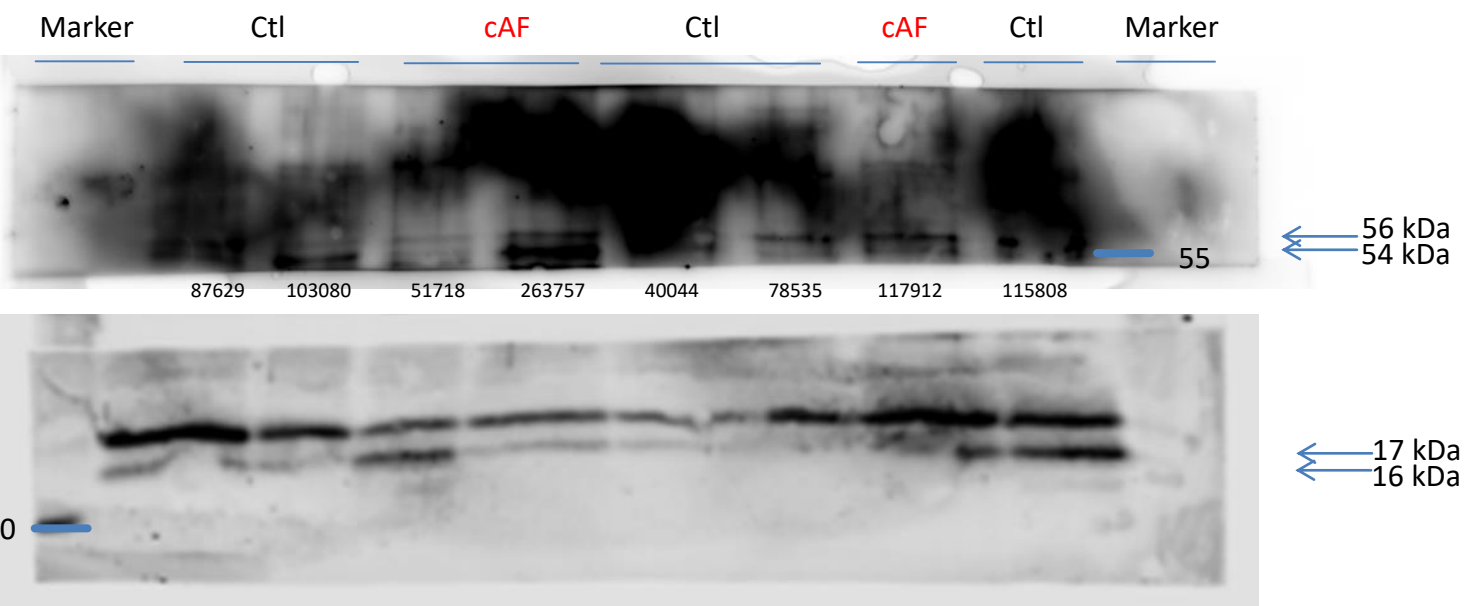

Nuclear CaMKII $\delta$   
(54/56 kDa)

Marker      Ctl      cAF      Ctl      Marker

CaMKII $\delta$

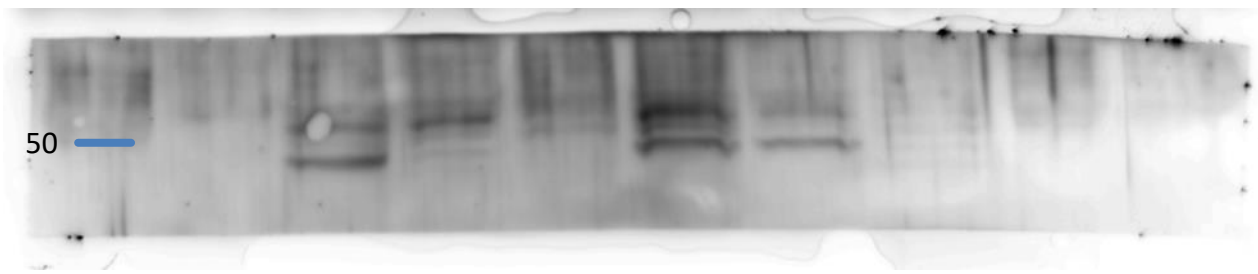

56 kDa  
54 kDa

Histone H3

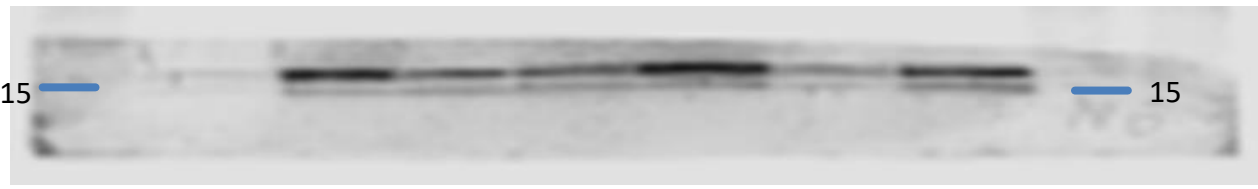

17 kDa  
16 kDa

Marker      Ctl      cAF      Ctl      cAF      Marker

CaMKII $\delta$

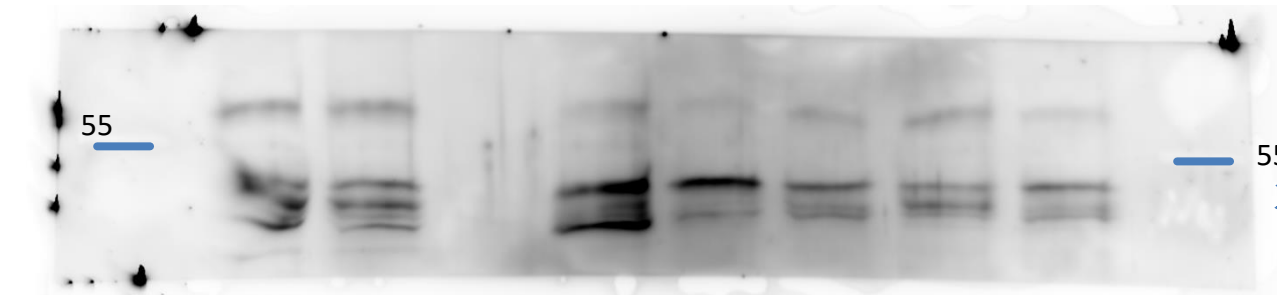

56 kDa  
54 kDa

Histone H3

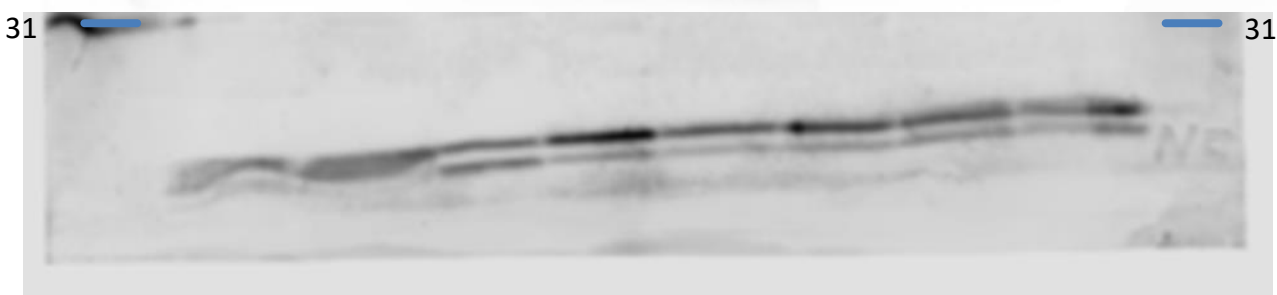

17 kDa  
16 kDa



Non-nuclear CaMKII $\delta$

(54/56 kDa)

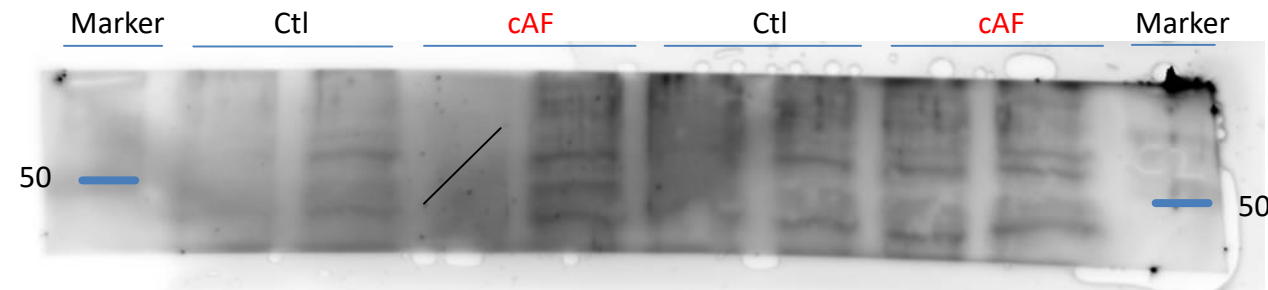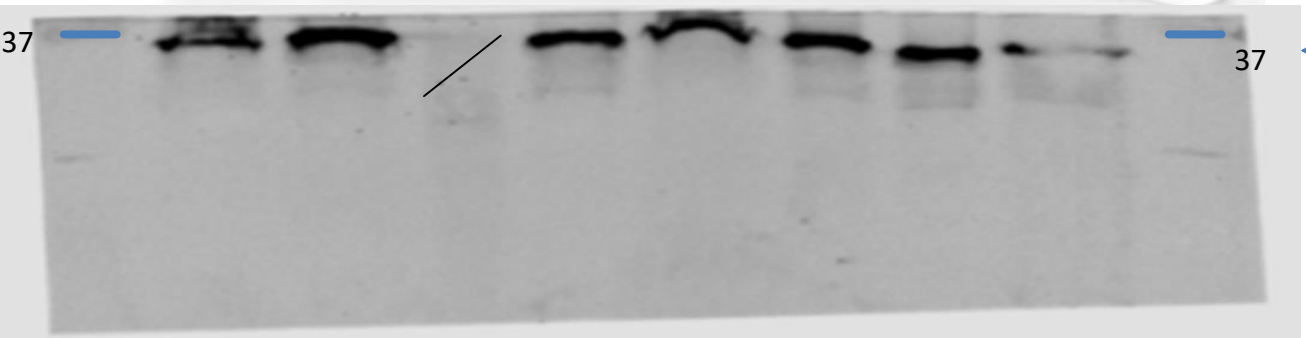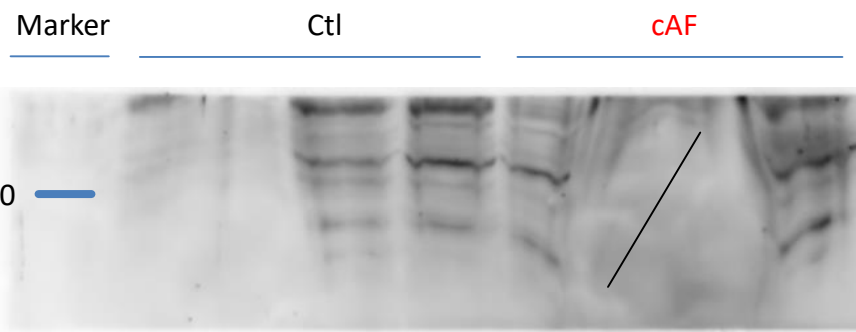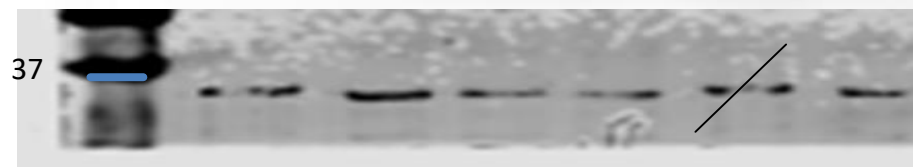

Nuclear p-CaMKII $\delta$   
(54/56 kDa)

Marker      Ctl      cAF      Ctl      cAF      Marker

p-CaMKII $\delta$

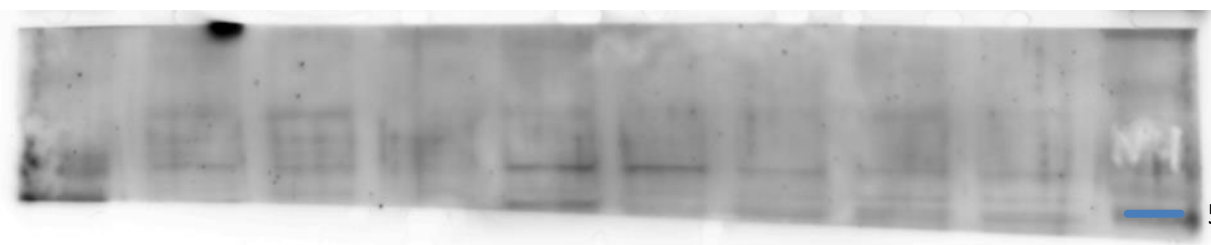

← 56 kDa

Histone H3

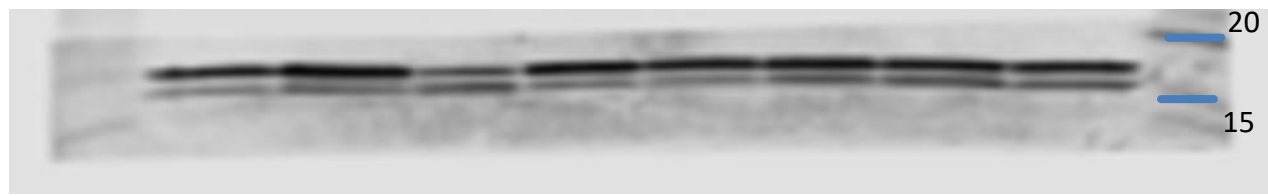

← 17 kDa  
← 16 kDa

Marker      Ctl      cAF      Ctl      cAF      Marker

p-CaMKII $\delta$

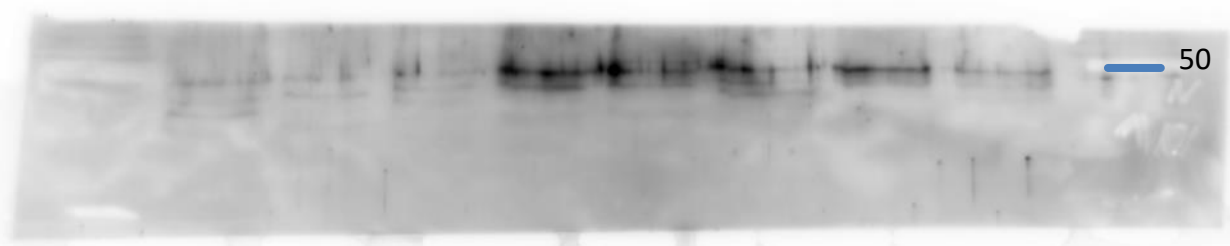

← 56 kDa  
← 54 kDa

Histone H3

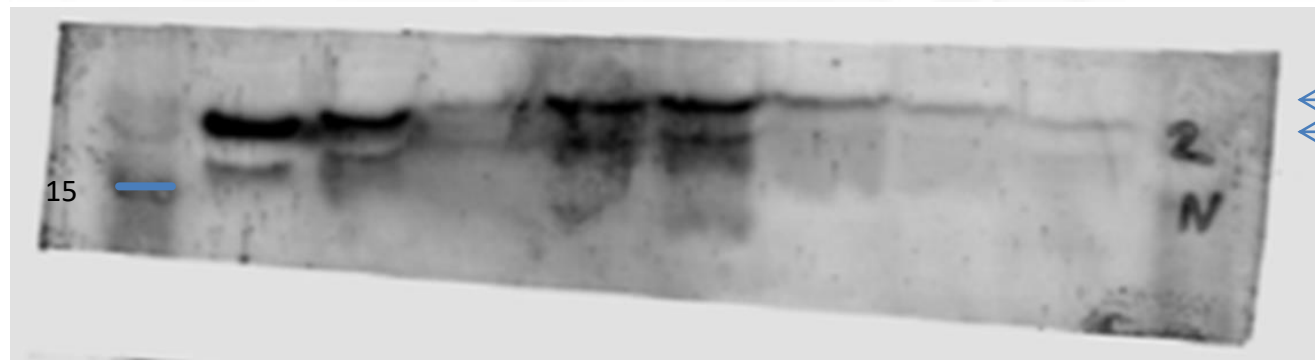

← 17 kDa  
← 16 kDa

# Non-nuclear p-CaMKII $\delta$

(56 kDa)

Marker      Ctl      cAF      Ctl      cAF      Marker

p-CaMKII $\delta$

55

55

← 56 kDa

GAPDH

41

31

41

31

← 37 kDa

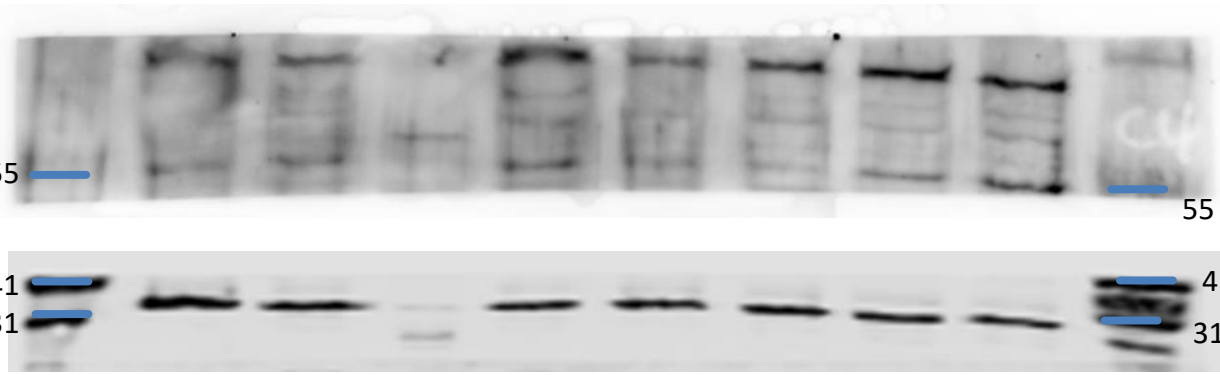

Marker      Ctl      cAF      Ctl      cAF      Marker

p-CaMKII $\delta$

50

50

← 56 kDa

GAPDH

37

← 37 kDa

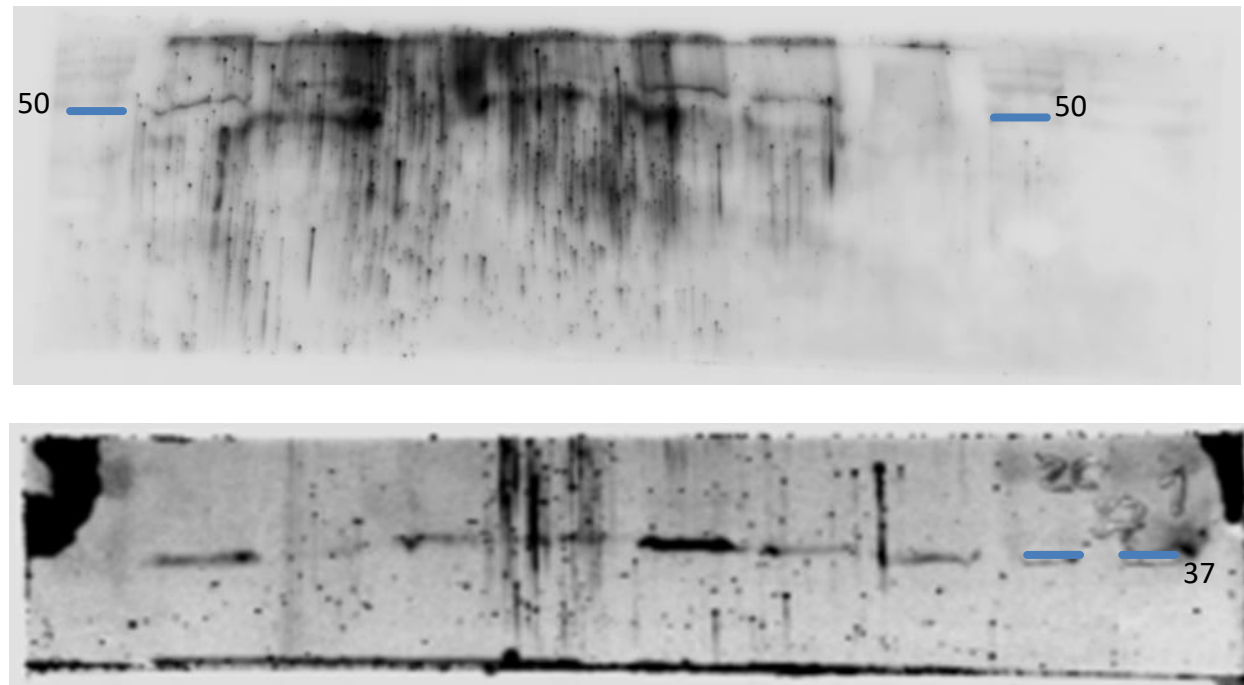

Supplement: NIHMS1659085-supplement-317768_Uncut_Gels.pdf [file NIHMS1659085-supplement-317768_Uncut_Gels.pdf]
