# Supplementary material
Source: PubMed Central journal article supplement (PMC8243404)
Supplement: NIHMS1659085-supplement-317768_Major_Resources_Table.pdf [file NIHMS1659085-supplement-317768_Major_Resources_Table.pdf]

## Major Resources Table

In order to allow validation and replication of experiments, all essential research materials listed in the Methods should be included in the Major Resources Table below. Authors are encouraged to use public repositories for protocols, data, code, and other materials and provide persistent identifiers and/or links to repositories when available. Authors may add or delete rows as needed.

### Animals (in vivo studies)

| Species | Vendor or Source | Background Strain                 | Sex | Persistent ID / URL |
|---------|------------------|-----------------------------------|-----|---------------------|
| Canine  | LAKA Inc.        | Random Source Mongrels, Foxhounds | M/F |                     |

### Genetically Modified Animals

|                 | Species | Vendor or Source | Background Strain | Other Information | Persistent ID / URL |
|-----------------|---------|------------------|-------------------|-------------------|---------------------|
| Parent - Male   | N/A     |                  |                   |                   |                     |
| Parent - Female |         |                  |                   |                   |                     |

### Antibodies

| Target antigen                                                                    | Vendor or Source         | Catalog #  | Working concentration     | Lot # (optional) | Persistent ID / URL                                                                                                                                                                                                                                 |
|-----------------------------------------------------------------------------------|--------------------------|------------|---------------------------|------------------|-----------------------------------------------------------------------------------------------------------------------------------------------------------------------------------------------------------------------------------------------------|
| <b>Immunocytochemistry (ICC) and immunoblotting (WB) of canine atrial samples</b> |                          |            |                           |                  |                                                                                                                                                                                                                                                     |
| CaMKII $\delta$ (Total)                                                           | Badrilla                 | A010-56AP  | ICC: 1:200<br>WB: 1:5,000 |                  | <a href="http://badrilla.com/media/datasheets/A010-56AP.pdf">http://badrilla.com/media/datasheets/A010-56AP.pdf</a>                                                                                                                                 |
| CaMKII $\delta$ (Thr305)                                                          | Thermo Fisher Scientific | PA5-38238  | ICC: 1:100                |                  | <a href="https://www.thermofisher.com/antibody/product/Phospho-CaMKII-alpha-beta-delta-Thr305-Antibody-Polyclonal/PA5-38238">https://www.thermofisher.com/antibody/product/Phospho-CaMKII-alpha-beta-delta-Thr305-Antibody-Polyclonal/PA5-38238</a> |
| CaMKII $\delta$ (Thr287)                                                          | Thermo Fisher Scientific | PA5-37833  | WB: 1:1,000               |                  | <a href="https://www.thermofisher.com/antibody/product/Phospho-CaMKII-beta-gamma-delta-Thr287-Antibody-Polyclonal/PA5-37833">https://www.thermofisher.com/antibody/product/Phospho-CaMKII-beta-gamma-delta-Thr287-Antibody-Polyclonal/PA5-37833</a> |
| GAPDH                                                                             | Fitzgerald               | 10R-G109a  | WB: 1:10,000              |                  | <a href="https://www.fitzgerald-fii.com/gapdh-antibody-10r-g109a.html">https://www.fitzgerald-fii.com/gapdh-antibody-10r-g109a.html</a>                                                                                                             |
| HDAC4 (Total)                                                                     | Santa Cruz               | sc-11418   | ICC: 1:50<br>WB: 1:100    |                  | <a href="https://www.scbt.com/p/hdac4-antibody-h-92">https://www.scbt.com/p/hdac4-antibody-h-92</a>                                                                                                                                                 |
| Histone H3                                                                        | Abcam                    | Ab1791     | WB: 1:10,000              |                  | <a href="https://www.abcam.com/histone-h3-antibody-nuclear-marker-and-chip-grade-ab1791.html">https://www.abcam.com/histone-h3-antibody-nuclear-marker-and-chip-grade-ab1791.html</a>                                                               |
| IP <sub>3</sub> R1                                                                | Alomone Labs             | ACC-019    | ICC: 1:100<br>WB: 1:100   |                  | <a href="https://www.alomone.com/p/anti-ip3-receptor-1/ACC-019">https://www.alomone.com/p/anti-ip3-receptor-1/ACC-019</a>                                                                                                                           |
| IP <sub>3</sub> R1                                                                | Neuromab                 | UCD-73-035 | WB: 1:10                  |                  | <a href="http://neuromab.ucdavis.edu/datasheet/L24_18.pdf">http://neuromab.ucdavis.edu/datasheet/L24_18.pdf</a>                                                                                                                                     |

|                                               |                          |             |                           |  |                                                                                                                                                                                                                                                                                                                                                                           |
|-----------------------------------------------|--------------------------|-------------|---------------------------|--|---------------------------------------------------------------------------------------------------------------------------------------------------------------------------------------------------------------------------------------------------------------------------------------------------------------------------------------------------------------------------|
| IP <sub>3</sub> R2                            | Alomone Labs             | ACC-116     | ICC: 1:200<br>WB: 1:500   |  | <a href="https://www.alomone.com/p/anti-ip3-receptor-2/ACC-116">https://www.alomone.com/p/anti-ip3-receptor-2/ACC-116</a>                                                                                                                                                                                                                                                 |
| Lamin A+C                                     | Abcam                    | ab108595    | ICC: 1:300                |  | <a href="https://www.abcam.com/lamin-a--lamin-c-antibody-epr4100-nuclear-envelope-marker-ab108595.html">https://www.abcam.com/lamin-a--lamin-c-antibody-epr4100-nuclear-envelope-marker-ab108595.html</a>                                                                                                                                                                 |
| NPC                                           | Abcam                    | ab24609     | ICC: 1:300                |  | <a href="https://www.abcam.com/nuclear-pore-complex-proteins-antibody-mab414-ab24609.html">https://www.abcam.com/nuclear-pore-complex-proteins-antibody-mab414-ab24609.html</a>                                                                                                                                                                                           |
| RyR2                                          | Thermo Fisher Scientific | MA3-916     | ICC: 1:200<br>WB: 1:1,000 |  | <a href="https://www.thermofisher.com/antibody/product/Ryanodine-Receptor-Antibody-clone-C3-33-Monoclonal/MA3-916">https://www.thermofisher.com/antibody/product/Ryanodine-Receptor-Antibody-clone-C3-33-Monoclonal/MA3-916</a>                                                                                                                                           |
| RyR2 (Ser2808)                                | Abcam                    | ab59225     | WB: 1:1,000               |  | <a href="https://www.abcam.com/ryanodine-receptor-2ryr-2-phospho-s2808-antibody-ab59225.html">https://www.abcam.com/ryanodine-receptor-2ryr-2-phospho-s2808-antibody-ab59225.html</a>                                                                                                                                                                                     |
| RyR2 (Ser2814)                                | Badrilla                 | A010-31     | WB: 1:1,000               |  | <a href="https://badrilla.com/ryanodine-receptor-2-ryr2-pser2814-pab-serum.html">https://badrilla.com/ryanodine-receptor-2-ryr2-pser2814-pab-serum.html</a>                                                                                                                                                                                                               |
| SERCA2a                                       | Thermo Fisher Scientific | MA3-910     | ICC: 1:200<br>WB: 1:5,000 |  | <a href="https://www.thermofisher.com/antibody/product/SERCA2-ATPase-Antibody-clone-IID8-Monoclonal/MA3-910">https://www.thermofisher.com/antibody/product/SERCA2-ATPase-Antibody-clone-IID8-Monoclonal/MA3-910</a>                                                                                                                                                       |
| Mouse IgG                                     | Thermo Fisher Scientific | 31903       | ICC: 1:100                |  | <a href="https://www.thermofisher.com/antibody/product/Mouse-IgG-Isotype-Control/31903">https://www.thermofisher.com/antibody/product/Mouse-IgG-Isotype-Control/31903</a>                                                                                                                                                                                                 |
| Rabbit IgG                                    | Thermo Fisher Scientific | 02-6102     | ICC: 1:100                |  | <a href="https://www.thermofisher.com/antibody/product/Rabbit-IgG-Isotype-Control/02-6102">https://www.thermofisher.com/antibody/product/Rabbit-IgG-Isotype-Control/02-6102</a>                                                                                                                                                                                           |
| <b>Secondary antibodies</b>                   |                          |             |                           |  |                                                                                                                                                                                                                                                                                                                                                                           |
| Donkey anti-mouse 488                         | Thermo Fisher Scientific | A-21202     | ICC: 1:600                |  | <a href="https://www.thermofisher.com/antibody/product/Donkey-anti-Mouse-IgG-H-L-Highly-Cross-Adsorbed-Secondary-Antibody-Polyclonal/A-21202">https://www.thermofisher.com/antibody/product/Donkey-anti-Mouse-IgG-H-L-Highly-Cross-Adsorbed-Secondary-Antibody-Polyclonal/A-21202</a>                                                                                     |
| Donkey anti-rabbit 555                        | Thermo Fisher Scientific | A-31572     | ICC: 1:600                |  | <a href="https://www.thermofisher.com/antibody/product/Donkey-anti-Rabbit-IgG-H-L-Highly-Cross-Adsorbed-Secondary-Antibody-Polyclonal/A-31572">https://www.thermofisher.com/antibody/product/Donkey-anti-Rabbit-IgG-H-L-Highly-Cross-Adsorbed-Secondary-Antibody-Polyclonal/A-31572</a>                                                                                   |
| Donkey anti-mouse IgG                         | Jackson Immuno           | 715-035-151 | WB: 1:5,000 or 1:10,000   |  | <a href="https://www.jacksonimmuno.com/catalog/products/715-035-151">https://www.jacksonimmuno.com/catalog/products/715-035-151</a>                                                                                                                                                                                                                                       |
| Donkey anti-rabbit IgG                        | Jackson Immuno           | 711-035-152 | WB: 1:5,000 or 1:10,000   |  | <a href="https://www.jacksonimmuno.com/catalog/products/711-035-152">https://www.jacksonimmuno.com/catalog/products/711-035-152</a>                                                                                                                                                                                                                                       |
| <b>Immunoblotting in human atrial samples</b> |                          |             |                           |  |                                                                                                                                                                                                                                                                                                                                                                           |
| CaMKII $\delta$ (Total)                       | BD Biosciences           | 611293      | 1:10,000                  |  | <a href="https://wwwbdbiosciences.com/us/reagents/research/antibodies-buffers/cell-biology-reagents/cell-biology-antibodies/purified-mouse-anti-cam-kinase-ii-45cam-kinase-ii/p/611293">https://wwwbdbiosciences.com/us/reagents/research/antibodies-buffers/cell-biology-reagents/cell-biology-antibodies/purified-mouse-anti-cam-kinase-ii-45cam-kinase-ii/p/611293</a> |

DOI [to be added]

|                             |                        |           |          |  |                                                                                                                                                                                                                                                                                                                                                         |
|-----------------------------|------------------------|-----------|----------|--|---------------------------------------------------------------------------------------------------------------------------------------------------------------------------------------------------------------------------------------------------------------------------------------------------------------------------------------------------------|
| CaMKIIδ (Thr287)            | Promega                | V1111     | 1:1,000  |  | <a href="https://nld.promega.com/resources/msds/msdss/v1000/v1111/">https://nld.promega.com/resources/msds/msdss/v1000/v1111/</a>                                                                                                                                                                                                                       |
| GAPDH                       | Tebu-Bio               | H86504M   | 1:20,000 |  | <a href="https://www.tebu-bio.com/Product/221H86504M/MAB_TO_GLYCERALDEHYDE_3_PDH_H86504M_.html">https://www.tebu-bio.com/Product/221H86504M/MAB_TO_GLYCERALDEHYDE_3_PDH_H86504M_.html</a>                                                                                                                                                               |
| HDAC4                       | Sigma/Merck            | H9536-200 | 1:1,000  |  | <a href="https://www.sigmaaldrich.com/catalog/product/sigma/h9536">https://www.sigmaaldrich.com/catalog/product/sigma/h9536</a>                                                                                                                                                                                                                         |
| Histone H3                  | Abcam                  | Ab1791    | 1:1,000  |  | <a href="https://www.abcam.com/histone-h3-antibody-nuclear-marker-and-chip-grade-ab1791.html">https://www.abcam.com/histone-h3-antibody-nuclear-marker-and-chip-grade-ab1791.html</a>                                                                                                                                                                   |
| IP <sub>3</sub> R1          | Alomone Labs           | ACC-019   | 1:100    |  | <a href="https://www.alomone.com/p/anti-ip3-receptor-1/ACC-019">https://www.alomone.com/p/anti-ip3-receptor-1/ACC-019</a>                                                                                                                                                                                                                               |
| SERCA2a                     | Santa Cruz             | sc-8095   | 1:1,000  |  | <a href="https://www.scbt.com/p/serca2-antibody-n-19">https://www.scbt.com/p/serca2-antibody-n-19</a>                                                                                                                                                                                                                                                   |
| <b>Secondary antibodies</b> |                        |           |          |  |                                                                                                                                                                                                                                                                                                                                                         |
| Goat anti-mouse             | LI-COR                 | 926-32210 | 1:20,000 |  | <a href="https://www.licor.com/bio/reagents/irdye-800cw-goat-anti-mouse-igg-secondary-antibody">https://www.licor.com/bio/reagents/irdye-800cw-goat-anti-mouse-igg-secondary-antibody</a>                                                                                                                                                               |
| Goat anti-rabbit            | LI-COR                 | 926-68071 | 1:20,000 |  | <a href="https://www.licor.com/bio/reagents/irdye-680rd-goat-anti-rabbit-igg-secondary-antibody">https://www.licor.com/bio/reagents/irdye-680rd-goat-anti-rabbit-igg-secondary-antibody</a>                                                                                                                                                             |
| Rabbit anti-goat            | Novus Bio              | NB7352    | 1:1,000  |  | <a href="https://www.novusbio.com/products/igg-h-l-antibody_nb7352">https://www.novusbio.com/products/igg-h-l-antibody_nb7352</a>                                                                                                                                                                                                                       |
| Goat anti-mouse             | Sigma/Merck            | 401215    | 1:1,000  |  | <a href="https://www.sigmaaldrich.com/catalog/product/mm/401215">https://www.sigmaaldrich.com/catalog/product/mm/401215</a>                                                                                                                                                                                                                             |
| Donkey anti-rabbit          | GE Healthcare (Cytiva) | NA934V    | 1:1,000  |  | <a href="https://www.cytivalifesciences.com/en/us/shop/protein-analysis/blotting-and-detection/blotting-standards-and-reagents/amersham-ecl-hrp-conjugated-antibodies-p-06260">https://www.cytivalifesciences.com/en/us/shop/protein-analysis/blotting-and-detection/blotting-standards-and-reagents/amersham-ecl-hrp-conjugated-antibodies-p-06260</a> |

### DNA/cDNA Clones

| Clone Name                           | Sequence                         | Source / Repository                                   | Persistent ID / URL                                                                                                                                       |
|--------------------------------------|----------------------------------|-------------------------------------------------------|-----------------------------------------------------------------------------------------------------------------------------------------------------------|
| miR-NC_S                             | <i>UCAUAAAGCUGAUAACCUCUAGAU</i>  | Integrated DNA Technologies Inc.,<br>Coralville, Iowa |                                                                                                                                                           |
| miR-NC_AS                            | <i>CUAGAGGUUAUCAGCUUUAUGAAU</i>  |                                                       |                                                                                                                                                           |
| miR-26a_S                            | <i>UUCAAGUAAUCCAGGAUAGGCU</i>    |                                                       |                                                                                                                                                           |
| miR-26a_AS                           | <i>CCUAUUCUUGGUUACUUGCACG</i>    |                                                       |                                                                                                                                                           |
| AMO-26a                              | <i>AGCCTATCCTGGATTACTTGAA</i>    | Exiqon-Qiagen,<br>Frederick, MD                       |                                                                                                                                                           |
| ITPR1 siRNA                          | <i>GCCAAGCAGTTTGGCTTCATGCAA</i>  | Invitrogen                                            |                                                                                                                                                           |
| ITPR2 siRNA                          | <i>CCGAGACTTAGACTTTGCCAATGAT</i> | Invitrogen                                            |                                                                                                                                                           |
| Stealth RNAi™ siRNA Negative Control |                                  | Invitrogen                                            | <a href="https://www.thermofisher.com/order/catalog/product/12935300#/12935300">https://www.thermofisher.com/order/catalog/product/12935300#/12935300</a> |

### Cultured Cells

| Name | Vendor or Source | Sex (F, M, or unknown) | Persistent ID / URL |
|------|------------------|------------------------|---------------------|
|------|------------------|------------------------|---------------------|

DOI [to be added]

|                                    |                                          |     |  |
|------------------------------------|------------------------------------------|-----|--|
| Adult Canine atrial cardiomyocytes | Cells from dog atria, dogs listed above. | M/F |  |
|------------------------------------|------------------------------------------|-----|--|

### Data & Code Availability

| Description                                                       | Source / Repository | Persistent ID / URL                                                                                                   |
|-------------------------------------------------------------------|---------------------|-----------------------------------------------------------------------------------------------------------------------|
| Custom software to analyze nuclear and cytosolic Ca <sup>2+</sup> | GitHub              | <a href="https://github.com/FengXiongCA/Nucleus-Cytosolic-Ca">https://github.com/FengXiongCA/Nucleus-Cytosolic-Ca</a> |

### qPCR oligonucleotide primer sequences

| Description  | Source / Repository | Persistent ID / URL |
|--------------|---------------------|---------------------|
| HPRT1        | TaqMan (4331182)    | cf02626258_m1       |
| <i>ITPR1</i> | TaqMan (4351372)    | cf02675749_m1       |
| <i>ITPR2</i> | TaqMan (4351372)    | cf02675776_m1       |
| <i>ITPR3</i> | TaqMan (4351372)    | cf02630200_m1       |
| miR-26a      | TaqMan (4427975)    | 000405              |
| U6 snRNA     | TaqMan (4427975)    | 001973              |

### Other

| Description                | Source / Repository                      | Persistent ID / URL |
|----------------------------|------------------------------------------|---------------------|
| Human right-atrial samples | University Medical Center Essen, Germany | #12-5268-BO         |
